# Supplementary material for: Enzyme-linked immunosorbent assay using recombinant envelope protein 2 antigen for diagnosis of Chikungunya virus
Source: Springer Nature journal article supplement (doi:10.1186/s12985-018-1028-1), 2018-07-24
Supplement: MOESM3 [file 15975136]

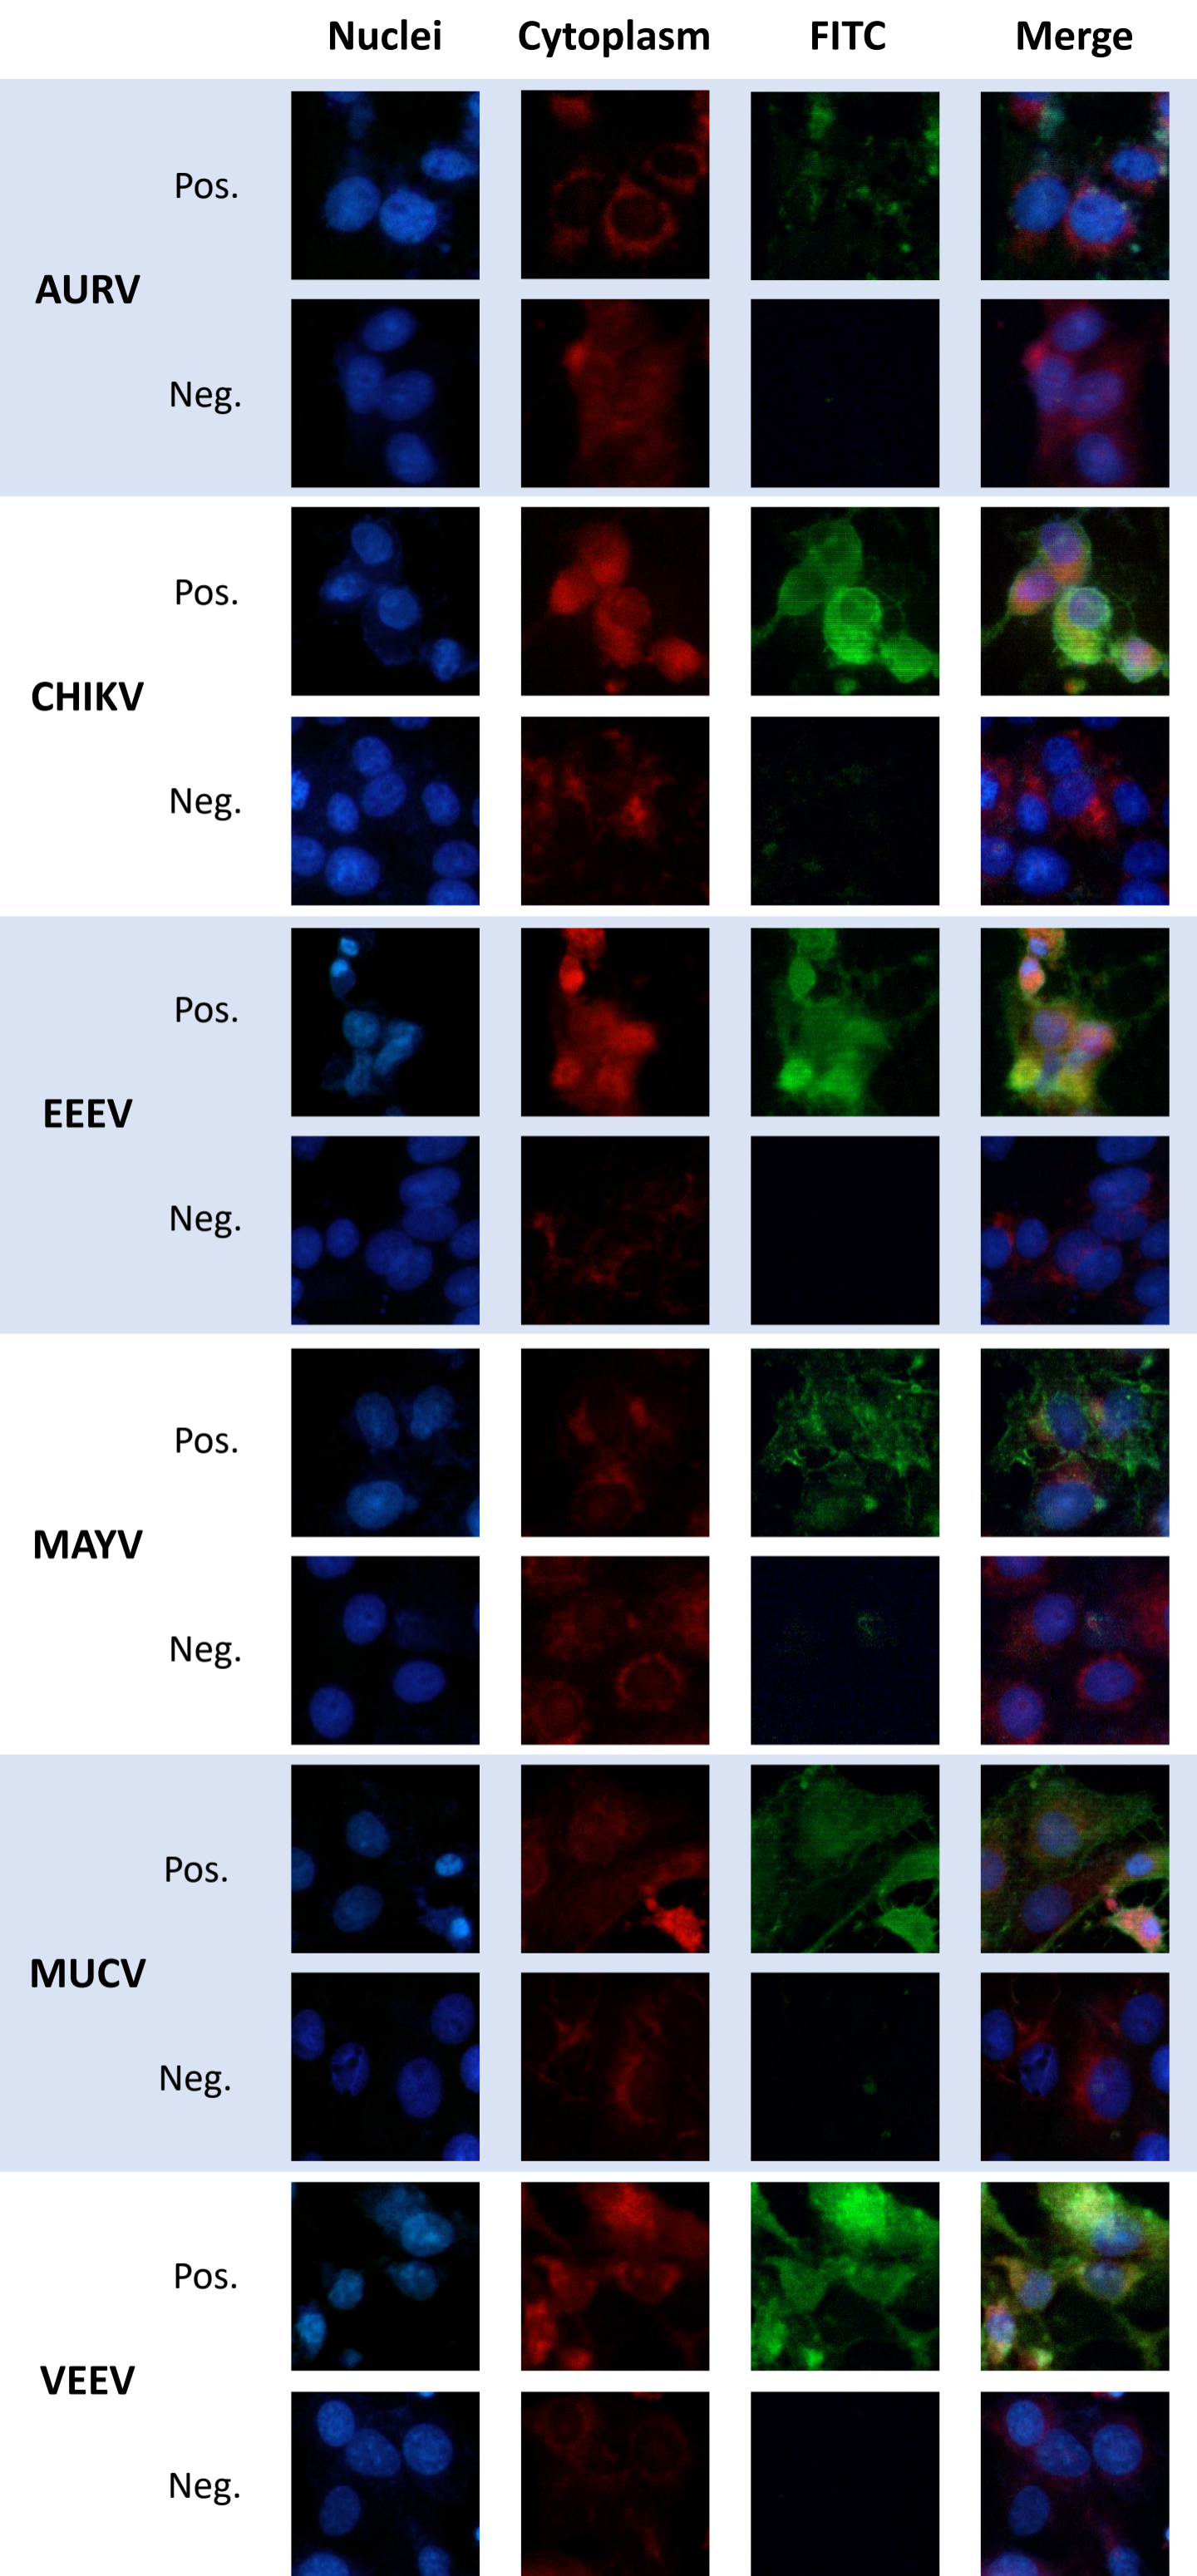

20  $\mu$ m
